# Supplementary material
Source: publisher figshare collection journal article supplement (https://wiley.figshare.com/articles/dataset/_/3515348)
Supplement: Supplementary file 1 [file 1 › appendix-A.htm]

Ecological Archives A020-058-A1


### *Ecological Archives* A020-058-A1

### **Sergey Rabotyagov, Todd Campbell, Manoj Jha, Philip W. Gassman, Jeffrey Arnold, Lyubov Kurkalova, Silvia Secchi, Hongli Feng, and Catherine L. Kling. 2010. Least-cost control of agricultural nutrient contributions to the Gulf of Mexico hypoxic zone. *Ecological Applications* 20:1542–1555.**

Appendix A. Algorithm description and additional results.

> View / download PDF.

---


[Back to A020-058]
